# Supplementary material for: Lower GLUT1 and unchanged MCT1 in Alzheimer’s disease cerebrovasculature
Source: PubMed Central journal article supplement — J Cereb Blood Flow Metab. 2024 Mar 5;44(8):1417–32. doi: 10.1177/0271678X241237484 (PMC11342728; doi:10.1177/0271678x241237484), 2024-03-05
Supplement: sj-pdf-1-jcb-10.1177_0271678X241237484.pdf [file sj-pdf-1-jcb-10.1177_0271678X241237484.pdf]

## **Supplementary material**

### LOWER GLUT1 AND UNCHANGED MCT1 IN ALZHEIMER'S DISEASE CEREBROVASCULATURE

Manon Leclerc<sup>1,2</sup>, Cytia Tremblay<sup>2</sup>, Philippe Bourassa<sup>1,2</sup>, Julie A. Schneider<sup>3</sup>, David A. Bennett<sup>3</sup>  
and Frédéric Calon<sup>1,2</sup>

1. Faculté de pharmacie, Université Laval, Québec, Québec, Canada

2. Axe Neurosciences, Centre de recherche du CHU de Québec – Université Laval, Québec, Québec, Canada

3. Rush Alzheimer's Disease Center, Rush University Medical Center, Chicago, IL, USA

| Protein                        | Role/localization                                                          | Host | Dilution              |       | Company Cat#                                       |
|--------------------------------|----------------------------------------------------------------------------|------|-----------------------|-------|----------------------------------------------------|
|                                |                                                                            |      | WB                    | IF    |                                                    |
| <b>β-Tubulin III</b>           | Neuronal microtubules                                                      | Rb   | 1/8000                |       | Sigma-Aldrich<br>Cat# T2200                        |
| <b>Aβ<sub>40</sub></b>         | Aβ peptide                                                                 | Ms   |                       | 1/100 | BioLegend<br>Cat# 805401                           |
| <b>Aβ<sub>42</sub></b>         |                                                                            | Ms   |                       | 1/100 | BioLegend<br>Cat# 805501                           |
| <b>ApoE</b>                    | Cholesterol carrier                                                        | Rb   | 1/2000                |       | Novus biologicals<br>Cat# NB110-55466              |
| <b>ApoE4 (clone 4E5)</b>       |                                                                            | Ms   | 1/5000                |       | Millipore<br>Cat# MABN43                           |
| <b>Collagen IV</b>             | Basal lamina                                                               | Gt   |                       | 1/500 | Millipore<br>Cat# AB769                            |
| <b>Cyclophilin B</b>           | Ubiquitous cellular proteins<br>Loading control                            | Rb   | 1/1000                |       | Abcam<br>Cat# 16045                                |
| <b>GLUT1</b>                   | Facilitated diffusion of glucose across a membrane                         | Ms   | 1/1000                |       | Abcam<br>Cat# 40084 (discontinued)                 |
|                                |                                                                            | Rb   |                       | 1/500 | Abcam<br>Cat# 115730                               |
| <b>MCT1</b>                    | Facilitates the unidirectional proton-linked transport of monocarboxylates | Ms   | 1/500                 | 1/500 | Santa Cruz Biotech.<br>Cat# sc365501               |
| <b>CD31</b>                    | Adhesion of endothelial cells                                              | Rb   | 1/1000                |       | Abcam<br>Cat# ab28364                              |
| <b>P-gp</b>                    | Efflux pump regulating the distribution and bioavailability of drug        | Rb   | 1/2000                |       | Abcam<br>Cat# ab170904                             |
| <b>GAP43</b>                   | Schwann cells component                                                    | Rb   | 1/4000                |       | Abcam<br>Cat# ab75810                              |
| <b>INSRα</b>                   | Human INSR extracellular α chain between His28-Lys944                      | Gt   | 1/500-<br>1/1000      |       | R and D Systems<br>Cat# AF1544                     |
| <b>INSRβ (E9L5V)</b>           | INSR cytosolic β chain and pro-INSR                                        | Rb   | 1/500                 |       | Cell Signaling Technology<br>Cat# 23413            |
| <b>Total Tau (OST)</b>         | Tau cytoskeletal protein                                                   | Rb   | 1/3000                |       | Osenses<br>Cat# OST00329W                          |
| <b>p-Tau T231/S235 (AT180)</b> |                                                                            | Ms   | 1/1000                |       | Thermo Fisher Scientific<br>Cat# MN1040            |
| <b>p-Tau S396/404 (AD2)</b>    |                                                                            | Ms   | 1/50                  |       | Biorad<br>Cat# 56484                               |
| <b>anti-Rabbit-HRP</b>         | HRP-conjugated                                                             | Gt   | 1/20 000-<br>1/60 000 |       | Jackson ImmunoResearch<br>Labs<br>Cat# 111-035-144 |
| <b>anti-Mouse-HRP</b>          |                                                                            | Gt   | 1/20 000-<br>1/60 000 |       | Jackson ImmunoResearch<br>Labs<br>Cat# 115-035-166 |
| <b>anti-Goat-HRP</b>           |                                                                            | Dk   | 1/30 000-<br>1/40 000 |       | Jackson ImmunoResearch<br>Labs<br>Cat# 705-035-147 |
| <b>anti-Goat-AF790</b>         |                                                                            | Dk   |                       | 1/500 | Jackson ImmunoResearch<br>Labs<br>Cat# 705-655-147 |
| <b>anti-Mouse-AF555</b>        |                                                                            | Dk   |                       | 1/500 | Thermo Fisher Scientific<br>Cat# A-31570           |
| <b>anti-Rabbit-AF555</b>       |                                                                            | Dk   |                       | 1/500 | Thermo Fisher Scientific<br>Cat# A-31572           |

### Supplementary Table 1 – List of antibodies used in this study for Western blotting and immunofluorescence

Abbreviations: Aβ, β-amyloid peptides; AF, Alexa Fluor; ApoE, Apolipoprotein E; CD31, Platelet endothelial cell adhesion molecule; Dk, Donkey; GAP43, Growth Associated Protein 43; GLUT1, Glucose transporter 1; Gt, Goat; HRP, Horseradish peroxidase; IF, Immunofluorescence; INSR, Insulin receptor; MCT1, Monocarboxylate transporter 1; Ms, Mouse; p, Phospho; P-gp, P-glycoprotein; Rb, Rabbit; WB, Western blot.

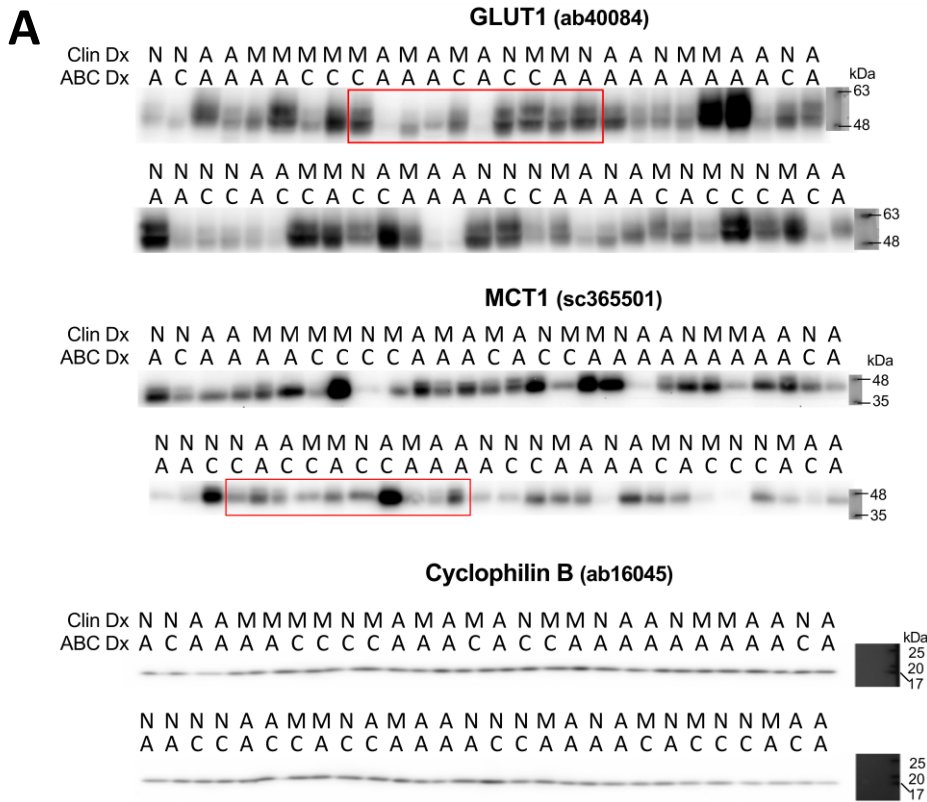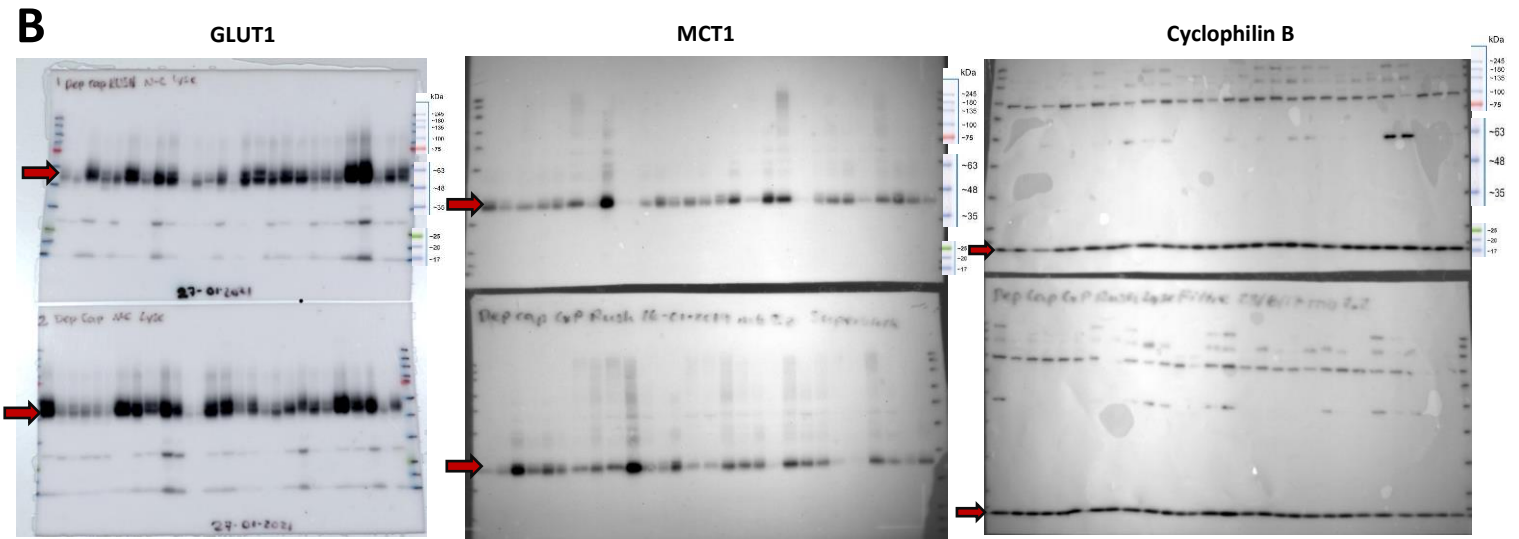

**Supplemental Figure 1 – Western blots of GLUT1 and MCT1 in human brain microvascular extracts**

Unedited Western immunoblotting image from experiments in human brain microvessels with MCT1 and GLUT1 with their respective antibody numbers (A) and full unedited blot for Figure 2 (B). Cyclophilin B was used as a loading control. Clinical diagnoses are given above each sample. An equal amount (8 μg) of proteins per sample was loaded. Red arrows indicate the level of protein migration and red rectangles

indicate the bands that were taken as representative photo examples in Fig.2. Samples were loaded in a random order to avoid quantification biases.

*Abbreviations: A, Alzheimer's Disease; C, Control; CypB, Cyclophilin B; Clin Dx, Clinical diagnosis; GLUT1, Glucose transporter 1; M, Mild cognitive impairment; MCT1, Monocarboxylate transporter; N, Healthy control with no cognitive impairment.*

| Proteins          | Analyzed factor | F ratio test effect | p-values      | Statistical analysis in Figure |
|-------------------|-----------------|---------------------|---------------|--------------------------------|
| <b>MCT1</b>       | ABC Dx          | $F_{1,52} = 0.76$   | 0.39          | ANC                            |
|                   | Clinical Dx     | $n/a^*$             | $n/a^*$       | KW                             |
|                   |                 | $F_{2,53} = 1.25$   | 0.30          | ANC                            |
|                   | Thal            | $F_{1,53} = 0.03$   | 0.87          | ANC                            |
|                   | Braak           | $F_{1,53} = 0.35$   | 0.56          | ANC                            |
|                   | CERAD           | $F_{1,53} = 1.22$   | 0.28          | ANC                            |
|                   | CAA             | $n/a^*$             | $n/a^*$       | KW                             |
| <b>GLUT1</b>      | ABC Dx          | $F_{1,52} = 9.08$   | <b>0.004</b>  | ANC                            |
|                   | Clinical Dx     | $n/a^*$             | $n/a^*$       | KW                             |
|                   |                 | $F_{2,53} = 5.78$   | <b>0.006</b>  | ANC                            |
|                   | Thal            | $F_{1,53} = 8.31$   | <b>0.006</b>  | ANC                            |
|                   | Braak           | $F_{1,53} = 4.92$   | <b>0.032</b>  | ANC                            |
|                   | CERAD           | $F_{1,53} = 17.02$  | <b>0.0002</b> | ANC                            |
|                   | CAA             | $n/a^*$             | $n/a^*$       | KW                             |
| <b>MCT1/GLUT1</b> | ABC Dx          | $n/a^*$             | $n/a^*$       | MW                             |
|                   |                 | $F_{1,50} = 0.87$   | 0.36          | ANC                            |
|                   | Clinical Dx     | $n/a^*$             | $n/a^*$       | KW                             |
|                   |                 | $F_{2,50} = 4.25$   | <b>0.022</b>  | ANC                            |

### Supplementary Table 2 – Supplemental statistical analyses

Estimate effect (F ratio and p-value) of statistical analyses in Figures 2 and 3, and Supplemental Figure 2.

\*A non-parametric test was used and is depicted in the Figure.

*Abbreviations: ABC, Dx Neuropathological Diagnosis; ANC, Analysis of covariance; CAA, Cerebral amyloid angiopathy; CERAD, Consortium to Establish a Registry for Alzheimer's Disease; Clinical Dx, Clinical Diagnosis; GLUT1, Glucose transporter 1; KW, Kruskal-Wallis one-way analysis on ranks; MCT1, Monocarboxylate transporter 1; MW, Mann-Whitney two groups comparison.*

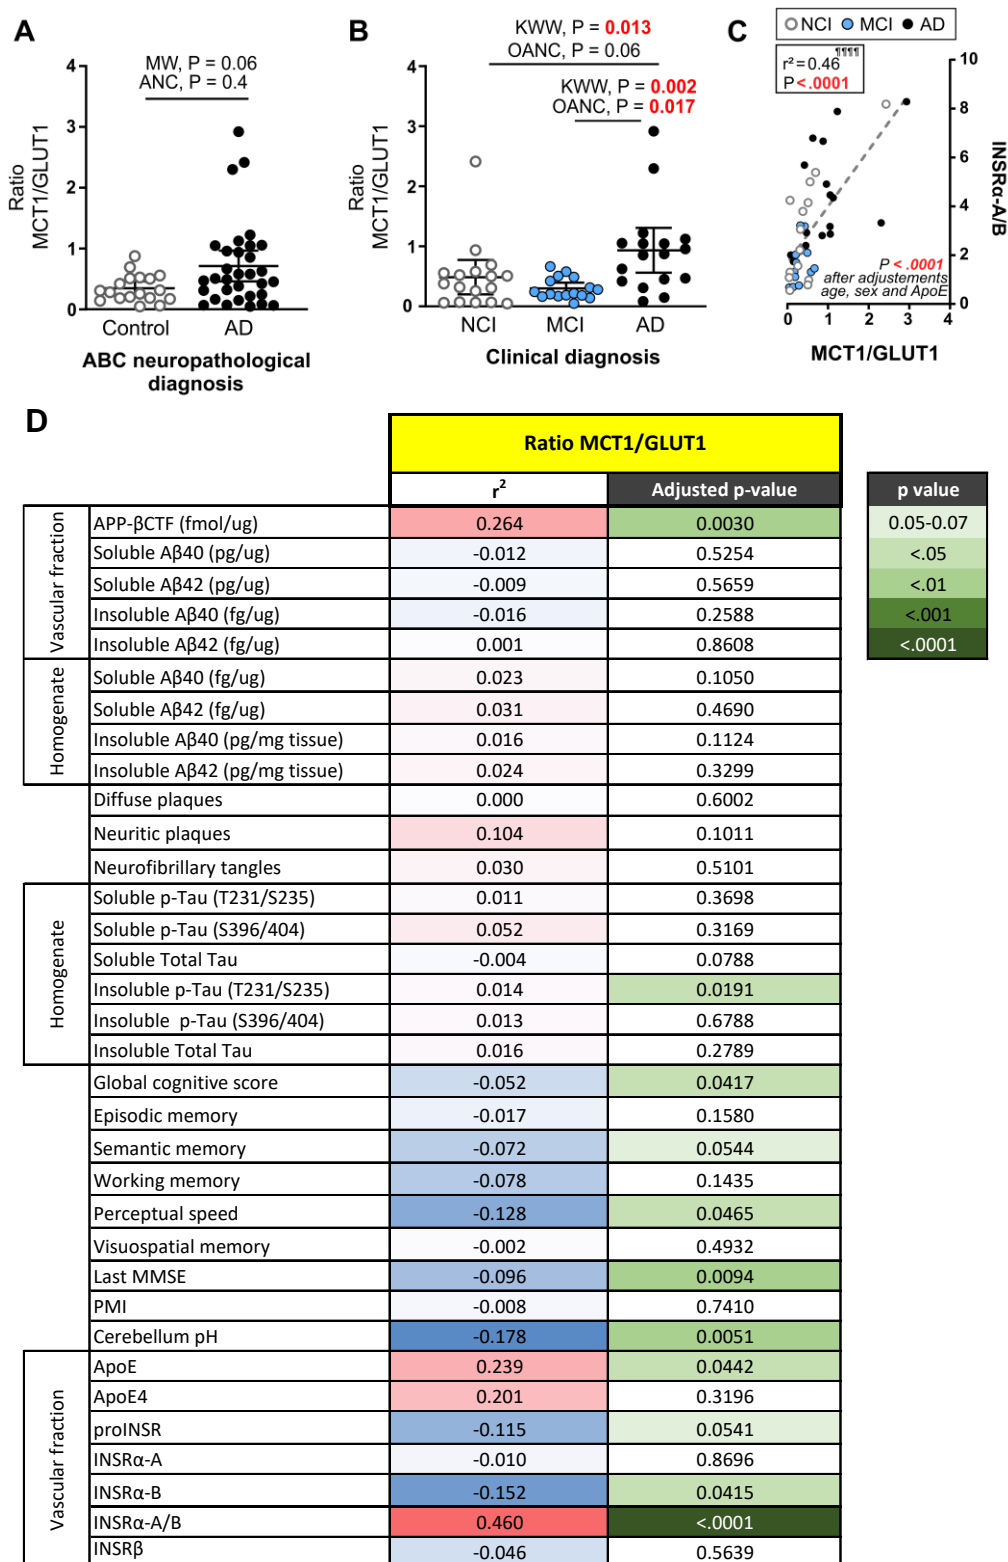

**Supplemental Figure 2 – Cerebrovascular MCT1/GLUT1 ratios are higher in clinically diagnosed AD participants, and significantly associated with INSR $\alpha$ -A/B ratios**

(A) Subjects were compared according to the neuropathological diagnosis following ABC criteria. (B) Subjects were grouped according to the clinical diagnosis. Protein content in human microvessel extracts

were determined by Western immunoblotting. Data are represented as scatterplots, with horizontal lines depicting means of relative optical density values with 95% confidence intervals. Additional statistical analyses are available in **Suppl. Table 2**. **(C)** MCT1/GLUT1 ratio was positively associated with global INSR $\alpha$ -A/B. **(D)** Linear regressions between the ratio of MCT1/GLUT1 in microvessel extracts and levels of other vascular/neuropathological proteins and cognitive scores (same as in Figure 4). Linear regressions include several AD-relevant variables in human parietal cortex, soluble and insoluble proteins, APP- $\beta$ CTF, A $\beta$  concentrations, levels of phosphorylated-Tau T231/S235 (AT180), S396/404 (AD2), total Tau, antemortem cognitive evaluation, post-mortem interval (PMI), cerebellum pH; as well as insulin receptor (INSR) microvessel-enriched fractions of human parietal cortex.

Statistical analysis: **(A)** Mann-Whitney test to identify significant differences between two groups (MW). Analysis of covariance F-test with sex, age at death and ApoE genotype as covariates (ANC). **(B)** Kruskal-Wallis one-way analysis of variance followed by a Wilcoxon's post hoc test (KWW), One-Way Analysis of covariance F-test with sex, age at death and ApoE genotype as covariates (OANC). **(C)** Linear regressions adjusted for the following covariates: gender, age at death and APOE genotype. Coefficients of determination ( $r^2$ ) are shown. **(D)** Cells highlighted in pink or darker blue, respectively, indicate significant positive and negative correlations. Deeper color shades indicate stronger  $r^2$  values. The intensity of green color indicates the significance.

*Abbreviations: A $\beta$ ,  $\beta$ -amyloid protein; ABC, Dx Neuropathological Diagnosis; AD, Alzheimer's disease; ANC, Analysis of covariance; APP- $\beta$ CTF, Amyloid Precursor Protein C-terminal fragment; ApoE4, apolipoprotein E epsilon 4; GLUT1, Glucose transporter 1; INSR, Insulin receptor; KWW, Kruskal-Wallis followed by Wilcoxon's test; MCI, Mild cognitive impairment; MCT1, Monocarboxylate transporter 1; MMSE, Mini-Mental State Examination; MW, Mann-Whitney two groups comparison; NCI, Healthy controls with no cognitive impairment; OANC, One-way analysis of covariance; PMI, Postmortem Interval; proINSR, INSR precursor.*
